1 **Inference of causal relationships based on the genetics of cardiometabolic traits and**  
2 **conditions unique to females in >50,000 participants**

3

4 Brenda Xiao<sup>1</sup>, Digna R. Velez Edwards<sup>2</sup>, Anastasia Lucas<sup>3</sup>, Theodore Drivas<sup>3</sup>, Kathryn  
5 Gray<sup>4</sup>, Brendan Keating<sup>5</sup>, Chunhua Weng<sup>6</sup>, Gail P. Jarvik<sup>7</sup>, Hakon Hakonarson<sup>8</sup>, Leah  
6 Kottyan<sup>9</sup>, Noemie Elhadad<sup>6</sup>, Regeneron Genetics Center, Wei-Qi Wei<sup>10</sup>, Yuan Luo<sup>11</sup>,  
7 Dokyoon Kim<sup>12</sup>, Marylyn Ritchie<sup>3</sup>, Shefali Setia Verma<sup>13\*</sup>

8

1. University of Pennsylvania

9

2. Division of Quantitative Sciences, Department of Obstetrics and Gynecology,

10

Vanderbilt University Medical Center

11

3. Department of Genetics, University of Pennsylvania

12

4. Brigham and Women's Hospital Department of Obstetrics and Gynecology

13

5. Department of Surgery, University of Pennsylvania

14

6. Department of Biomedical Informatics, Columbia University

15

7. Departments of Medicine (Medical Genetics) and Genome Sciences, University of

16

Washington Medical Center

17

8. Center for Applied Genomics, Children's Hospital of Philadelphia

18

9. Center for Autoimmune Genomics and Etiology and Division of Allergy &

19

Immunology, Cincinnati Children's Hospital Medical Center, Department of

20

Pediatrics, University of Cincinnati

21

10. Department of Biomedical Informatics, Vanderbilt University Medical Center

22

11. Department of Preventive Medicine, Feinberg School of Medicine, Northwestern

23

University

24

12. Department of Biostatistics and Epidemiology, University of Pennsylvania

25

13. Department of Pathology and Laboratory Medicine, University of Pennsylvania

26

NOTE: This preprint reports new research that has not been certified by peer review and should not be used to guide clinical practice.

27 **Abstract:**

28

29 **Background:** Cardiometabolic diseases are highly comorbid and associated with poor health  
30 outcomes. However, the investigation of the relationship between the genetic predisposition  
31 to cardiometabolic diseases with the risk of conditions unique to females such as breast  
32 cancer, endometriosis and pregnancy-related complications is highly understudied. This  
33 study aimed to estimate the cross-trait genetic overlap and influence of genetic burden of  
34 cardiometabolic traits on health conditions unique to females.

35 **Methods:** We obtained data for female participants in the Penn Medicine BioBank (PMBB;  
36 21,837 samples) and the electronic MEDical Records and GENomics (eMERGE; 49,171  
37 samples) network. We examined the relationship between four cardiometabolic phenotypes  
38 (body mass index (BMI), coronary artery disease (CAD), type 2 diabetes (T2D) and  
39 hypertension (through blood pressure measurements)) and 23 female health conditions by  
40 performing four analyses: 1) Cross-trait genetic correlation analyses to compare genetic  
41 architecture. 2) Polygenic risk scores (PRS)-based association tests to characterize shared  
42 genetic effects on disease risk. 3) Mendelian randomization (MR) for significant associations  
43 to assess cross-trait causal relationships. 4) Chronology analyses to visualize the timeline of  
44 events unique to groups of females with high and low genetic burden for cardiometabolic  
45 traits and highlight the disease prevalence in risk groups by age.

46 **Results:** We observed high genetic correlation among cardiometabolic and female health  
47 conditions. PRS meta-analysis identified 29 significant associations reflecting potential  
48 shared biology among common cardiometabolic phenotypes and female health conditions.  
49 Significant associations include  $PRS_{BMI}$  with endometrial cancer and polycystic ovarian  
50 syndrome (PCOS),  $PRS_{CAD}$  with breast cancer, and the  $PRS_{T2D}$  with gestational diabetes and  
51 PCOS. Mendelian randomization provided additional evidence of independent causal effects  
52 between T2D and gestational diabetes and CAD and with breast cancer. Our results reflected

53 inverse association between PRS<sub>CAD</sub> and breast cancer. Lastly, as visualized from chronology  
54 analyses, individuals with high PRS are also more likely to develop conditions such as PCOS  
55 and gestational hypertension at earlier ages.

56 **Conclusions:** Polygenic susceptibility to cardiometabolic traits is associated with conditions  
57 unique to females. Several of these associations are likely to result from the complex  
58 pathophysiology of cardiometabolic risk, and others may reflect potential pleiotropic effects  
59 that go beyond cardiometabolic health in females.

## 60 **Introduction:**

61           Cardiometabolic diseases such as coronary artery disease (CAD), obesity,  
62 hypertension, and type 2 diabetes (T2D) are profoundly prevalent and among the leading  
63 causes of death in the world<sup>5,6,7</sup>. Cardiometabolic conditions are highly comorbid and  
64 considered as risk factors for sequelae of many diseases, such as depression, anxiety, chronic  
65 obstructive pulmonary disease (COPD), and cancer, to name a few<sup>8,9</sup>. These conditions  
66 affect female individuals disproportionately because they are also linked to disorders of the  
67 reproductive system and adverse outcomes of pregnancy and childbirth such as preeclampsia,  
68 gestational diabetes, stillbirth, and pregnancy loss<sup>10,11</sup>. Many studies suggest that the  
69 pathophysiology of cardiometabolic diseases affects males and females differently<sup>14</sup>. There  
70 are multiple shreds of evidence supporting the relationship between female health conditions  
71 and cardiometabolic diseases. For instance, people who develop preeclampsia during  
72 pregnancy are more likely to develop cardiovascular diseases and hypertension after  
73 pregnancy<sup>15,16</sup>. Additionally, obesity and polycystic ovarian syndrome (PCOS) are closely  
74 linked conditions, and people with PCOS are at high risk of developing T2D<sup>17-19</sup>. People with  
75 endometriosis are also at high risk for developing oncological cancers and cardiovascular  
76 diseases such as myocardial infarction and ischemic heart disease<sup>20,21</sup>. However, the  
77 relationship between female health and cardiometabolic phenotypes, particularly the potential  
78 for any shared genetic burden between them, is still highly understudied. The investigation of  
79 shared genetic burden could lead to identifying obesity and cardiometabolic cluster-related  
80 risk factors associated with female health conditions to modify standard screening practices  
81 in people at high risk for many diseases.

82           Genome-wide association studies (GWAS) in the past couple of decades have  
83 exposed common cross-trait connections. Disease traits such as type 2 diabetes, obesity,  
84 sleep apnea, hypertension, Alzheimer's diseases, and many cancer types have been shown to

85 share genetic etiology<sup>1-4</sup>. GWAS have identified >1000 loci with a likely impact on  
86 cardiometabolic phenotypes, but the effect size of any single variant is generally tiny. Many  
87 methods have identified relationships between different phenotypes and traits by calculating  
88 their genetic correlation from GWAS effect sizes. In addition, to more accurately estimate an  
89 individual's overall risk for disease, researchers have used GWAS to calculate polygenic risk  
90 scores (PRS), which sum up the effect of common single nucleotide polymorphisms (SNPs)  
91 throughout the genome into a single score of overall genetic burden for a phenotype<sup>27</sup>. PRS  
92 have been shown to predict the risk of many cardiometabolic diseases and its  
93 comorbidities<sup>28,29</sup>.

94 Our approach to investigating the impact of genetic burden of cardiometabolic traits  
95 in female health conditions is to measure the genetic correlation and association of  
96 cardiometabolic PRS with EHR-derived phenotypes. Many prior studies have successfully  
97 used PRS as the genetic risk factor for identifying links between overall genetic risk for one  
98 phenotype to other phenotypes<sup>31,32</sup>. PRS-based association tests make fewer assumptions and  
99 have the benefit that they are based on unvarying risk factors (i.e., inherited genetic burden).  
100 We hypothesize that the genetic burden for cardiometabolic phenotypes could further explain  
101 the phenotypic variance in health conditions unique to females. This present study obtained  
102 genotyped data and a wide range of female health conditions from the Penn Medicine  
103 BioBank (PMBB) and the Electronic Medical Records and Genomics (eMERGE) Network.  
104 We measured pairwise genetic correlation between cardiometabolic phenotypes and female  
105 health conditions to identify the strength of shared genetic factors. The association of PRS  
106 with multiple selected phenotypes is further used to estimate the significance of associations  
107 between cardiometabolic genetic burden and female health conditions. We additionally  
108 evaluated the causal relationship between significant associations by using Mendelian  
109 randomization (MR) approaches. Lastly, electronic health record (EHR) data provides the

110 opportunity to map female health by considering the disease prevalence by age. We  
111 generated a chronological map of diseases in participants in high and low PRS groups to  
112 understand the prevalence of diseases in the two risk groups at different ages.

113 **Methods:** The authors have individual level access to genotype and medical record data  
114 from the Penn Medicine BioBank and the Electronic Medical Records and Genomics  
115 network datasets.

### 116 *Study Populations*

117 ***Penn Medicine BioBank:*** The Penn Medicine BioBank (PMBB) is a University of  
118 Pennsylvania academic biobank which recruits patient-participants from the University of  
119 Pennsylvania Health System around the greater Philadelphia area in the United States.  
120 PMBB links an individual's genotype data with detailed electronic health record (EHR)  
121 information. Currently, PMBB consists of genome-wide genotyped and whole-exome  
122 sequenced data on ~45,000 samples. PMBB is a diverse cohort, with over 25% of  
123 participants of African ancestry. PMBB genotyped data is imputed to TOPMED Reference  
124 panel using the Michigan Imputation server. We included 21,837 female participants from  
125 PMBB in this study (Table 1). The stratified analyses in this study only included participants  
126 of European and African ancestry and excluded those from Asian and Hispanic ancestries  
127 due to the limiting sample size.

128

129 ***eMERGE:*** The Electronic Medical Records and Genomics (eMERGE) Network is a  
130 nationwide consortium containing individuals with genome-wide genotyped data linked to  
131 EHRs from several health systems across the United States, with most participants from the  
132 Geisinger Health System and Vanderbilt University. eMERGE data is imputed to Haplotype  
133 Reference Consortium panel using Michigan Imputation Server. Like PMBB, the eMERGE

134 cohort is diverse across ancestries and ages. This study was performed on 49,171 female  
135 patients in eMERGE born after 2001 (Table 1).

### 136 *Genome-wide association studies for cardiometabolic phenotypes*

137 Most genetic correlation and PRS calculation methods require effect sizes of variants  
138 on the phenotypes determined through large GWAS. Given the diverse nature of our study  
139 population, we obtained the largest publicly available multi-ancestry GWAS summary  
140 statistics for six cardiometabolic phenotypes: obesity (measured through body mass index  
141 (BMI), CAD, hypertension (measured through diastolic blood pressure (DBP), systolic blood  
142 pressure (SBP), and pulse pressure (PP)), and T2D. The summary statistics used for each  
143 phenotype and its respective study is referenced in Table 2.

144

### 145 *Genome-wide association for female health conditions*

146 Large multi-ancestry GWAS are not available for most female health conditions  
147 evaluated in this study. Thus, we used PLINK version 1.90 to conduct GWAS for the female  
148 health conditions in PMBB and eMERGE datasets<sup>33</sup>. We filtered the variants in the PMBB  
149 imputed datasets to include only those with imputation quality  $R^2 > 0.3$  and minor allele  
150 frequency  $> 0.01$ . We then meta-analyzed the GWAS from our two cohorts in PLINK.

### 151 *Genetic correlation calculation*

152 We calculated pairwise genetic correlation between cardiometabolic phenotypes and  
153 female health conditions using LD score regression (LDSC), with the large publicly available  
154 cardiometabolic GWAS and the meta-analyzed GWAS for female health conditions from  
155 PMBB and eMERGE as input GWAS<sup>34</sup>. LDSC accounts for linkage disequilibrium (LD)  
156 among SNPs by using an external reference panel that should also match the ancestry

157 distribution of the GWAS. We generated a multi-ancestry LD reference panel using the  
158 HapMap3 SNPs (~1M common variants) from the entire 1000 Genomes population.

### 159 *Polygenic Risk Scores (PRS)*

160 PRS calculated using GWAS performed in one ancestry group tend to perform poorly  
161 in individuals from different ancestries<sup>27,35,36</sup>. To accurately calculate a PRS for our diverse  
162 target datasets (PMBB and eMERGE), we calculated a PRS for the six different  
163 cardiometabolic phenotypes using the large publicly available multi-ancestry GWAS used in  
164 the genetic correlation analyses. Weights for each SNP included in the PRS were calculated  
165 using PRS-CS (version from Apr 24, 2020)<sup>38</sup>. Like LDSC, PRS-CS requires a reference  
166 panel that matches the ancestry distribution of the target dataset, and we generated a similar  
167 multi-ancestry LD reference panel using the HapMap SNPs from 1000 Genomes. We used  
168 PLINK(v1.90) to identify LD blocks and calculate the LD between the SNPs in each block.  
169 For PRS-CS, the global shrinkage parameter  $\phi$  was fixed to 0.01, and default values were  
170 selected for all other parameters. PRS was then calculated using these weights through  
171 PLINK. Only the SNPs in the target dataset, summary statistics, and LD reference panel were  
172 included in the PRS. The number of SNPs used for PRS calculation is listed in Table 2.  
173 Scores were then normalized to obtain meaningful beta coefficients.

174 To evaluate the power of PRS, we tested the performance of each PRS on predicting  
175 the primary phenotype of the summary statistics. We could not obtain any blood pressure  
176 quantitative measurements for participants from eMERGE, and PP and SBP measurements  
177 were not curated in PMBB. Therefore, we evaluated the performance of the PRS from blood  
178 pressure traits (SP, DBP, PP) in eMERGE on hypertension case-control phenotype and in  
179 PMBB by predicting DBP or hypertension (for SBP and PP) as outcomes. We constructed  
180 logistic regression models for binary phenotypes (CAD, T2D, and hypertension), and  
181 evaluated PRS performance based on the area under the receiver-operator curve (AUC) using



182 R's *pROC* package. Similarly, we constructed linear regression models for continuous  
183 phenotypes (BMI and DBP) and evaluated them based on the  $R^2$  using R's *glm* function. The  
184 regression models used birth year and the first five principal components (PCs) as covariates.  
185 We tested PRS performance in all individuals as well as in only European and African  
186 ancestry individuals.

### 187 *Phenotype data*

188 Cases and controls for each phenotype were defined using International Classification  
189 of Disease (ICD) diagnosis codes. Participants were coded as cases for a phenotype if they  
190 had at least one occurrence of the corresponding ICD codes. For pregnancy-related  
191 phenotypes, participants were only considered as controls for a phenotype if they had at least  
192 one occurrence of a pregnancy-related ICD code and no occurrences of codes for certain  
193 complications during pregnancy (such as miscarriage) or any of the case ICD codes.  
194 Participants were counted as controls for cardiometabolic and all other female health  
195 conditions if they did not have any of the case ICD codes. The complete list of all ICD codes  
196 used to include or exclude participants as cases and controls can be found in Supplementary  
197 Table 1. Using these definitions, we determined the sample size for each phenotype in  
198 eMERGE and PMBB (Table 1).

### 199 *PRS association analyses*

200 We tested the association of each cardiometabolic PRS and female health conditions  
201 by fitting separate logistic regression models, adjusting the models by birth year and the first  
202 five PCs. We conducted this analysis in all participants as well as ancestry-stratified analyses  
203 for individuals of European and African ancestry. To account for biases from multiple  
204 hypothesis testing, we determined if these associations passed an FDR-significance threshold  
205 of 0.05, using the number of female health conditions (23) as the number of hypotheses

206 tested. The logistic regressions were performed using R's *glm* function, and results from  
207 PMBB and eMERGE were combined using the *rma* function from the *metafor* R package  
208 under the restricted maximum-likelihood estimator model<sup>37</sup>. We used PheWAS-View to  
209 visualize our results<sup>39</sup>. We then created prevalence plots for each significant association.  
210 Participants were divided into quintiles based on their PRS, and the percentage of cases for  
211 the most significant female health conditions was calculated at each quintile.

## 212 *Mendelian Randomization*

213 To identify potential evidence of causality between cardiometabolic phenotypes and  
214 female health conditions, we performed one-sample Mendelian randomization (MR) for 29  
215 significant associations from PRS analyses using the *ivreg* function from the *ivpack* R  
216 package. Cardiometabolic PRS were used as genetic instruments in the one-sample MR, with  
217 birth year and the first five PCs included as covariates. Results were combined through meta-  
218 analysis using the *metafor* R package as done in the PRS meta-analysis. Since the low sample  
219 size for some of the female health conditions could limit the power of our analyses, we also  
220 performed two-sample MR for the same associations using the inverse variance weighted  
221 (IVW) method in the *twoSampleMR* package in R<sup>40</sup>. MR sensitivity analyses were conducted  
222 using the weighted median and the MR Egger methods through the same package. Genetic  
223 instruments for cardiometabolic phenotypes in the two-sample MR were defined as genome-  
224 wide significant SNPs in the GWAS summary statistics used to calculate the PRS. SNPs  
225 were LD pruned according to LD patterns in the 1000 Genomes HapMap SNPs, and the  
226 representative SNPs were included in the analysis. Matching genetic instruments for female  
227 health conditions were obtained from publicly available GWAS available through the  
228 *twoSampleMR* package (Supplementary Table 2).

229

## 230 *Chronology Analyses*

231 We divided participants into high-risk and low-risk groups according to each  
232 cardiometabolic PRS. High PRS was defined as the top quintile (PRS > 80 percentile), and  
233 low PRS was defined as the bottom quintile (PRS < 20 percentile). We obtained the age at  
234 the first occurrence of each female health condition according to the ICD record. For  
235 pregnancy-related conditions, participants were split into three age groups: <25, 25-40, and  
236 40-55. We excluded participants who were over 55 at the first occurrence of pregnancy-  
237 related conditions due to low sample sizes and potential errors in diagnosis coding. For all  
238 other conditions, participants were split into five different age groups: <25, 25-40, 40-55, 55-  
239 70, and >70. We examined the combined case prevalence in PMBB and eMERGE for female  
240 health conditions in high and low PRS groups across all age groups.

241

## 242 **Results:**

### 243 *Genetic correlation among cardiometabolic phenotypes and female health conditions*

244 The six cardiometabolic phenotypes were significantly correlated with six different  
245 female health conditions for a total of 13 statistically significant correlations (Figure 1A).  
246 BMI was significantly correlated with breast cancer ( $R_g=-0.179$ ,  $p=0.011$ ) and PCOS  
247 ( $R_g=0.4$ ,  $p=0.007$ ), CAD with breast cancer ( $R_g=-0.199$ ,  $p=0.011$ ), PCOS ( $R_g=0.216$ ,  
248  $p=0.04$ ), and postpartum depression ( $R_g=0.204$ ,  $p=0.025$ ), PP with gestational hypertension  
249 ( $R_g=0.481$ ,  $p=0.0025$ ), SBP with breast cancer ( $R_g=-0.153$ ,  $p=0.041$ ) and gestational  
250 hypertension ( $R_g=0.523$ ,  $p=0.0017$ ), and T2D with breast cancer ( $R_g=-0.196$ ,  $p=0.0001$ ),  
251 excessive fetal growth ( $R_g=0.126$ ,  $p=0.044$ ), gestational diabetes ( $R_g=0.529$ ,  $p=0.011$ ),  
252 gestational hypertension ( $R_g=0.237$ ,  $p=0.028$ ), and PCOS ( $R_g=0.316$ ,  $p=0.0093$ ).

## 253 *PRS performance on primary phenotype*

254 We calculated a PRS for six cardiometabolic phenotypes for individuals in PMBB  
255 and eMERGE and checked the distribution of the raw and normalized PRS (Supplementary  
256 Figures 1-6). The full model for all PRS generally performed well in predicting the primary  
257 phenotype across ancestry groups (Table 3). PRS was significantly ( $p < 0.05$ ) associated with  
258 the primary phenotype for all cardiometabolic phenotypes. The covariate only model (null  
259 model) generally performed better in African ancestry individuals than in European  
260 individuals, but the PRS only model generally performed better in European ancestry  
261 individuals. We calculated the difference between the full and null models for all  
262 cardiometabolic PRS in PMBB and eMERGE and found that the PRS improved predictive  
263 performance significantly more for European ancestry participants than for African ancestry  
264 participants ( $p = 0.000488$ , Wilcoxon signed rank test). As such, the cardiometabolic PRS were  
265 more accurate in European ancestry individuals but still significantly improved predictive  
266 performance in African ancestry individuals.

## 267 *Association of cardiometabolic PRS association and female health conditions*

268 We detected numerous associations between cardiometabolic PRS and female health  
269 conditions in the meta-analyzed results (Figure 1B-D). 29 associations were statistically  
270 significant after correcting for multiple hypothesis burden through FDR significance (Table  
271 4). Most of these associations were also significantly associated in both PMBB and eMERGE  
272 separately (Supplementary Figures 7-12). In the meta-analysis, for all and European ancestry  
273 individuals, the  $PRS_{BMI}$  was significantly associated with endometrial cancer ( $\beta_{all}=0.24$ ,  
274  $se_{all}=0.046$ ,  $p_{all}=9.4 \times 10^{-8}$ ;  $\beta_{eur}=0.28$ ,  $se_{eur}=0.087$ ,  $p_{eur}=0.0015$ ), gestational diabetes  
275 ( $\beta_{all}=0.23$ ,  $se_{all}=0.051$ ,  $p_{all}=6 \times 10^{-6}$ ;  $\beta_{eur}=0.28$ ,  $se_{eur}=0.062$ ,  $p_{eur}=8.7 \times 10^{-6}$ ), and PCOS  
276 ( $\beta_{all}=0.27$ ,  $se_{all}=0.039$ ,  $p_{all}=2.4 \times 10^{-12}$ ;  $\beta_{eur}=0.29$ ,  $se_{eur}=0.045$ ,  $p_{eur}=6.8 \times 10^{-11}$ ). The

277 PRS<sub>BMI</sub> was also significantly associated with breast cancer in all individuals ( $\beta_{\text{all}}=-0.071$ ,  
278  $\text{se}_{\text{all}}=0.022$ ,  $p_{\text{all}}=0.0016$ ). These results suggest that an increased genetic burden for obesity  
279 and high BMI also increases the risk for endometrial cancer, gestational diabetes, and PCOS  
280 but decreases the risk for breast cancer. The PRS<sub>CAD</sub> was also significantly associated with  
281 breast cancer for all and European ancestry individuals ( $\beta_{\text{all}}=-0.072$ ,  $\text{se}_{\text{all}}=0.015$ ,  $p_{\text{all}}=1 \times 10^{-6}$ ;  
282  $\beta_{\text{eur}}=-0.07$ ,  $\text{se}_{\text{eur}}=0.017$ ,  $p_{\text{eur}}=3.1 \times 10^{-5}$ ). This highly significant negative association  
283 suggests that individuals, particularly those of European ancestry, with high PRS<sub>CAD</sub> are at  
284 relatively lower risk for breast cancer compared to individuals with low PRS<sub>CAD</sub>. The PRS<sub>T2D</sub>  
285 was also significantly associated with gestational diabetes in all and European ancestry  
286 individuals ( $\beta_{\text{all}}=0.58$ ,  $\text{se}_{\text{all}}=0.063$ ,  $p_{\text{all}}=1.2 \times 10^{-20}$ ;  $\beta_{\text{eur}}=0.68$ ,  $\text{se}_{\text{eur}}=0.076$ ,  $p_{\text{eur}}=3.9 \times 10^{-19}$ )  
287 and with PCOS in all, European ancestry, and African ancestry individuals ( $\beta_{\text{all}}=0.22$ ,  
288  $\text{se}_{\text{all}}=0.043$ ,  $p_{\text{all}}=1.9 \times 10^{-7}$ ;  $\beta_{\text{eur}}=0.21$ ,  $\text{se}_{\text{eur}}=0.049$ ,  $p_{\text{eur}}=1.6 \times 10^{-5}$ ;  $\beta_{\text{afr}}=0.32$ ,  $\text{se}_{\text{afr}}=0.1$ ,  
289  $p_{\text{afr}}=0.0021$ ). The link between T2D and these female related phenotypes is well known, and  
290 our results support a potential genetic basis linking these phenotypes<sup>18,19</sup>. Among all and  
291 European ancestry individuals, the PRS<sub>T2D</sub> was also significantly associated with gestational  
292 hypertension ( $\beta_{\text{all}}=0.18$ ,  $\text{se}_{\text{all}}=0.064$ ,  $p_{\text{all}}=0.0041$ ;  $\beta_{\text{eur}}=0.18$ ,  $\text{se}_{\text{eur}}=0.067$ ,  $p_{\text{eur}}=0.008$ ) and  
293 breast cancer ( $\beta_{\text{all}}=-0.073$ ,  $\text{se}_{\text{all}}=0.021$ ,  $p_{\text{all}}=0.00066$ ;  $\beta_{\text{eur}}=-0.079$ ,  $\text{se}_{\text{eur}}=0.026$ ,  
294  $p_{\text{eur}}=0.0027$ ).

295 The three-blood pressure traits PRS (PRS<sub>DBP</sub>, PRS<sub>SBP</sub>, and PRS<sub>PP</sub>) showed varying  
296 significant associations with gestational hypertension and preeclampsia in the PMBB and  
297 eMERGE meta-analysis. There was no sign of association between the PRS<sub>DBP</sub> and these  
298 phenotypes in the meta-analysis. However, the PRS<sub>DBP</sub> was significantly associated with  
299 gestational hypertension in PMBB all and African ancestry individuals ( $p=1 \times 10^{-5}$ , 0.00041)  
300 and nominally associated ( $p<0.01$ ) with preeclampsia in African ancestry participants  
301 ( $p=0.0063$ ). The PRS<sub>PP</sub> was significantly associated with gestational hypertension for all and

302 European ancestry participants ( $\beta_{\text{all}}=0.22$ ,  $\text{se}_{\text{all}}=0.044$ ,  $p_{\text{all}}=8.5 \times 10^{-7}$ ;  $\beta_{\text{eur}}=0.24$ ,  
303  $\text{se}_{\text{eur}}=0.056$ ,  $p_{\text{eur}}=2.5 \times 10^{-5}$ ) and with preeclampsia for all participants ( $\beta_{\text{all}}=0.2$ ,  $\text{se}_{\text{all}}=0.058$ ,  
304  $p_{\text{all}}=0.00076$ ). The  $\text{PRS}_{\text{SBP}}$  was significantly associated with gestational hypertension and  
305 preeclampsia in all, European ancestry, and African ancestry individuals (Gestational  
306 hypertension:  $\beta_{\text{all}}=0.33$ ,  $\text{se}_{\text{all}}=0.083$ ,  $p_{\text{all}}=5.6 \times 10^{-5}$ ;  $\beta_{\text{eur}}=0.31$ ,  $\text{se}_{\text{eur}}=0.066$ ,  $p_{\text{eur}}=3.6 \times 10^{-6}$ ;  
307  $\beta_{\text{afr}}=0.4$ ,  $\text{se}_{\text{afr}}=0.099$ ,  $p_{\text{afr}}=5.7 \times 10^{-5}$ ; Preeclampsia:  $\beta_{\text{all}}=0.28$ ,  $\text{se}_{\text{all}}=0.08$ ,  $p_{\text{all}}=0.00057$ ;  
308  $\beta_{\text{eur}}=0.23$ ,  $\text{se}_{\text{eur}}=0.071$ ,  $p_{\text{eur}}=0.0013$ ;  $\beta_{\text{afr}}=0.36$ ,  $\text{se}_{\text{afr}}=0.1$ ,  $p_{\text{afr}}=0.00052$ ).

309 For each FDR-significant association in both PMBB and eMERGE, we looked at the  
310 case prevalence of the female health condition per the associated PRS quintile (Figure 2B  
311 and Supplementary Figures 13-17). The trends matched the results we obtained from the  
312 association analyses across ancestry groups and in both datasets. Distribution of the number  
313 of cases increased as the PRS percentile increased for the positive associations in the  
314 association analysis, such as PCOS with the  $\text{PRS}_{\text{BMI}}$ . The number of cases for breast cancer  
315 decreased when increasing the  $\text{PRS}_{\text{CAD}}$  percentile, matching the inverse association between  
316 breast cancer and the  $\text{PRS}_{\text{CAD}}$  (Figure 2B).

317

### 318 *Association of $\text{PRS}_{\text{CAD}}$ and breast cancer*

319 To validate the inverse association between  $\text{PRS}_{\text{CAD}}$  and breast cancer, we examined  
320 the genetic correlation between CAD and breast cancer from the UKBB Genetic Correlation  
321 Browser (Figure 2A). The genetic correlation between I9\_CHD (Major coronary heart  
322 disease event) and C50 (Diagnoses-main ICD10: C50 Malignant neoplasm of breast) was  
323 significantly negative ( $R_g=-0.24$ ,  $p=0.0325$ ).

324 Additionally, to evaluate the risk of ascertainment biases and the reporting of  
325 comorbidities in the EHR, we performed the associations of CAD PRS with breast cancer in  
326 females who are not diagnosed with CAD ( $n=61,201$ ). In the individuals who were not

327 diagnosed with CAD, we observed slightly less significant association between breast cancer  
328 and CAD ( $\beta_{\text{all}}=-0.0484$ ,  $p_{\text{all}}=0.0045$ ;  $\beta_{\text{eur}}=-0.0464$ ,  $p_{\text{eur}}=0.0112$ ) than in the full set of  
329 individuals. These associations attenuated but were not completely diminished when  
330 evaluating participants who were not diagnosed with CAD. Next, given the longitudinal  
331 nature of availability of comorbidities in the EHR, we aimed to measure the impact of risk of  
332 CAD on the first reported incidence of CAD and breast cancer in females. The overlap on  
333 individuals who were diagnosed with CAD and breast cancer in our study population  
334 suggests that females with a diagnosis of CAD are less likely to be diagnosed or report a  
335 history of breast cancer (Figure 2C).

336

### 337 ***Mendelian Randomization***

338 We performed one-sample MR in PMBB and eMERGE for the 29 associations that  
339 were FDR-significant and combined them through a meta-analysis (Figure 3A). The majority  
340 of analyses were significant ( $p < 0.05$ ), and the direction of the estimated beta coefficient for  
341 each association aligned with the direction of effect seen in the PRS association analysis. Our  
342 results support a potential causal relationship between many cardiometabolic phenotypes and  
343 female health conditions, with the most significant associations being between T2D and  
344 gestational diabetes (All:  $p=1.5 \times 10^{-11}$ ,  $\beta=1.52$ ,  $se=0.23$ ; EUR:  $p=2.4 \times 10^{-10}$ ,  $\beta=1.78$ ,  
345  $se=0.28$ ) and BMI and PCOS (All:  $p=1.1 \times 10^{-8}$ ,  $\beta=0.0021$ ,  $se=0.00037$ ; EUR:  $p=3.6 \times 10^{-8}$ ,  
346  $\beta=0.0021$ ,  $se=0.0038$ ).

347 We also performed two-sample MR to leverage the power of larger GWAS for our  
348 female health conditions (Figure 3B). Most analyses were significant when using the IVW  
349 method but became less significant when using the MR Egger and the weighted median  
350 methods. Some associations remained significant for all three methods, particularly CAD  
351 with breast cancer (IVW:  $\beta=-0.0587$ ,  $se=0.021$ ,  $p=0.00463$ ; MR Egger:  $\beta=-0.102$ ,

352 se=0.049, p=0.04; Weighted median: beta=-0.0642, se=0.028, p=0.021) and T2D and  
353 gestational diabetes (IVW: beta=0.613, se=0.044, p=1.73x10<sup>-43</sup>; MR Egger: beta=0.656,  
354 se=0.11, p=8.8x10<sup>-10</sup>; Weighted median: beta=0.635, se=0.066, p=8.12x10<sup>-22</sup>).

355

### 356 *Investigation of the role of population stratification*

357 Population stratification could have confounded our results in the PRS association  
358 and the MR analyses. Therefore, we tested the association of the PRS with the PCs  
359 (Supplementary Table 3). The high R<sup>2</sup> for most cardiometabolic PRS shows that a large  
360 amount of the variance in the PRS could be explained by the PCs when considering all multi-  
361 ancestry variables, and the R<sup>2</sup> decreases when analyzing only European or African ancestry  
362 groups. The PCs explained more of the variance in PRS for African ancestry individuals than  
363 European ancestry individuals, a finding that suggests there is more population stratification  
364 among our African ancestry individuals and that there could be confounding factors  
365 influencing some results. To overcome these biases, we accounted for PCs in both our PRS  
366 association analyses and the one-sample MR analyses. Additionally, we ran one-sample MR  
367 without adjusting for the covariates (PCs and birth year) and compared the results with the  
368 adjusted ones (Supplementary Table 4).

369

### 370 *Chronology analyses*

371 EHR is a powerful resource to visualize the landscape of events in a patient's  
372 diagnosis. Continuing on the theme of genetic correlation and the influence of shared genetic  
373 burden of cross-trait analyses, we investigated if an individual's genetic burden for  
374 cardiometabolic diseases may also affect the time at which they develop certain female health  
375 conditions. Case prevalence for female health conditions was generally higher in the high  
376 PRS group in the younger age groups (Figure 4 and Supplementary Figures 18-22). Many



377 pregnancy-related phenotypes were most prevalent in the 25-40 years age group, but for  
378 participants who developed those phenotypes in the <25 years age group, the relative  
379 difference in prevalence between the high-risk and low-risk PRS group was larger. The  
380 cardiometabolic PRS used to define high-risk and low-risk groups did not seem to affect case  
381 prevalence for most phenotypes, but phenotypes found to be associated with specific  
382 cardiometabolic PRS in the association analysis did show differences across PRS. Gestational  
383 hypertension and preeclampsia were generally more prevalent in the younger age groups (<25  
384 and 25-40) for participants with high blood pressure PRS than for participants with high PRS  
385 for other phenotypes. Similar trends were observed for other traits, such as the PRS<sub>T2D</sub> with  
386 gestational diabetes and the PRS<sub>BMI</sub> with PCOS. High prevalence of endometriosis and  
387 uterine fibroid cases were also observed in individuals with high-risk PRS, particularly in the  
388 age group 25-40.

## 389 **Discussion:**

390 We have demonstrated high genetic correlation and shared genetic burden between  
391 cardiometabolic traits and female health conditions spanning across many obstetrics and  
392 gynecological disorders. Additionally, this study shows that genome-wide PRS of  
393 cardiometabolic traits has potential translational effects in health conditions unique to  
394 females. Initially, we calculated the genetic correlation between phenotypes related to  
395 cardiometabolic diseases and traits with female health conditions. Genetic correlation  
396 analyses suggested a high overlap among the shared genetic etiology of all phenotypes tested  
397 in this study. We further investigated the effect of this shared genetic burden by generating  
398 PRS for cardiometabolic phenotypes and testing their association to various female-specific  
399 disease conditions. PRS was generally predictive of the primary phenotype, and we identified  
400 several FDR-significant associations with female health conditions that were statistically

401 significant after meta-analyzing both datasets. Prior research has established relationships  
402 (mainly non-genetic factors) between many of these associations, such as BMI with PCOS  
403 and T2D with gestational diabetes<sup>17,18</sup>. Epidemiological studies have also shown evidence  
404 that people with obesity are at high risk for endometrial cancer<sup>41</sup>. The associations identified  
405 in this study between female health conditions and cardiometabolic PRS suggest genetic basis  
406 for these cross-trait categories. In addition, we performed Mendelian randomization and  
407 identified potential causal relationships.

408         Unexpectedly, all of our analyses showed that the PRS<sub>CAD</sub> was inversely associated  
409 with breast cancer in European ancestry participants. CAD and breast cancer share many  
410 common risk factors, such as smoking and diet<sup>42</sup>. However, our results suggest that a high  
411 genetic burden for CAD is protective for breast cancer. Participants in our cohorts with high  
412 PRS<sub>CAD</sub> had lower incidence of breast cancer. When we evaluated the individuals with high  
413 PRS<sub>CAD</sub> but no CAD diagnoses, we still saw a moderate but decreased risk for breast cancer.  
414 Several factors might contribute to these associations. First, these patterns might reflect  
415 ascertainment biases and competing risks. Individuals with higher risk of CAD likely live  
416 shorter lives and thus are not diagnosed with breast cancer. Second, the treatments and drugs  
417 given for treating CAD might also protect against breast cancer. Lastly, genetic mechanisms  
418 predisposing individuals to CAD might show protective effects for breast cancer. Briefly,  
419 among the SNPs that passed genome-wide significance in the CAD GWAS we used to  
420 calculate the PRS<sub>CAD</sub>, 125/220 SNPs had opposite directions of effects in the breast cancer  
421 GWAS we used in the two-sample MR. For example, *rs1011970* (CAD: beta=-0.0407,  
422 p=6.94x10<sup>-10</sup>; breast cancer: beta=0.053, p=3.1x10<sup>-5</sup>) is a known risk variant for both CAD  
423 and breast cancer and maps to the *CDKN2B-AS1* gene, which helps silence genes  
424 epigenetically in the *CDKN2A-CDKN2B* cluster<sup>43</sup>. *CDKN2B-AS1* knockdown suppresses  
425 breast cancer progression, and decreased expression of *CDKN2B* increases development of

426 atherosclerotic plaques<sup>44-46</sup>. Variants that promote decreased *CDKN2B-AS1* expression could  
427 increase breast cancer risk but increase expression of *CDKN2B* and subsequently decrease  
428 CAD risk. A recent study also shows this protective effect of a PRS<sub>CAD</sub> on breast cancer, and  
429 more research should be undertaken to uncover the mechanisms behind this association<sup>47</sup>.

430 The differences between the three PRS<sub>blood pressure</sub> suggests that analyzing the genetic  
431 burden for all three blood pressure traits might elucidate the understanding of hypertension  
432 during pregnancy. Only the PRS<sub>SBP</sub> was significantly associated with gestational  
433 hypertension and preeclampsia in African ancestry individuals. Prior studies have identified  
434 variability in the predictive performance when using different blood pressure measurements  
435 to predict hypertension and other diseases, and our results warrant further studies to replicate  
436 this association in other large multi-ancestry datasets to reach a more definite conclusion on  
437 the role blood pressure measurements play in predicting hypertensive diseases during  
438 pregnancy<sup>48,49</sup>.

439 To further investigate the effect of cardiometabolic genetic burden on conditions  
440 unique to females, we drew information from EHRs to capture the landscape of trajectories of  
441 diseases presented at different ages. We found that a high genetic burden for most  
442 cardiometabolic phenotypes could increase risk of developing female health conditions at  
443 earlier ages, even if there was no overall association between the PRS and the condition. For  
444 example, the PRS<sub>BMI</sub> was not associated with many pregnancy-related complications such as  
445 gestational hypertension and ectopic pregnancy. However, in the youngest age group (<25),  
446 these phenotypes were more prevalent in the high PRS<sub>BMI</sub> group than the low PRS<sub>BMI</sub> group.  
447 Similarly, there was no association overall between the PRS<sub>SBP</sub> and PCOS or endometriosis,  
448 but participants who developed PCOS before 25 years old or endometriosis between 25-40  
449 years old were more likely to have high PRS. The difference in case prevalence between high  
450 and low PRS groups for these phenotypes decreased in older age groups. Patients with high

451 genetic burden for cardiometabolic phenotypes could be at higher risk to develop female  
452 health conditions at younger ages. These findings can be particularly of importance to  
453 prioritize patients for early screening.

454 The limitations of our study point to many promising future directions. First, our  
455 study establishes a link between the genetic burden for different cardiometabolic phenotypes  
456 and several diseases unique to females. However, we estimate the genetic burden by using  
457 PRS alone, which are calculated based on common variants and do not include the effects of  
458 other genetic risk factors such as rare variants and copy number variations. Second, our  
459 analysis does not consider clinical or environmental factors that could influence the  
460 associations between cardiometabolic and female health conditions. We found that  
461 population stratification is potentially present in our datasets and accounted PCs in our  
462 analyses accordingly. However, important social and environmental risk factors such as  
463 education level and socioeconomic status were missing and could not be properly accounted  
464 for in our current analyses. Our focus on PRS alone reflects the current limitations of  
465 methods for multi-modal risk model predictions. Current widespread interest in building  
466 integrative risk models suggests that this gap can be closed in the near future<sup>27,50</sup>.  
467 Furthermore, the weaker performance of PRS in African ancestry individuals contributed to  
468 the lack of power to identify African ancestry specific associations and suggests the urgent  
469 need for expanding studies to include more racially and ethnically diverse cohorts.

470 The low sample size for some conditions may have limited the power of our one-  
471 sample MR analyses. In addition, while our two-sample MR uses GWAS from larger cohorts,  
472 they were performed on populations of primarily European ancestry and thus lack the power  
473 to detect causality for the non-European ancestry participants in our cohort. The effects we  
474 see in our MR results may be biased due to horizontal pleiotropy, in which genetic variants  
475 associated with the exposure (cardiometabolic phenotypes) affect other traits that

476 subsequently influence the outcome (female health conditions). The effects of pleiotropy can  
477 be seen from the decreased statistical significance when using the weighted median and MR  
478 Egger methods in the two-sample MR. For example, the relationship between T2D and PCOS  
479 became insignificant when using the MR Egger method ( $p = 0.109$ ) compared to the IVW  
480 method ( $p = 0.000148$ ). These methods account for pleiotropy and other confounding factors  
481 but may not have captured all their effects.

482 EHRs are particularly advantageous in investigating disease trajectories and  
483 progression. Our analyses in this study provided a big picture visualization of the burden of  
484 early diagnoses of disease unique to females at early ages among the high cardiometabolic  
485 PRS group. However, these analyses might point to the ascertainment biases of EHR and  
486 including confounding factors for statistically informed findings. This study illustrates the  
487 influence of cardiometabolic genetic burden on diverse phenotypes. Our findings serve as the  
488 initial basis for presenting the clinical utility of cardiometabolic PRS as non-modifiable risk  
489 factors for screening and early diagnostic tools for a variety of obstetric and gynecological  
490 conditions. To improve the power of cardiometabolic PRS for predicting risk for female  
491 health conditions and better understand the relationship between these phenotypes, future  
492 studies should incorporate PRS with other genetic and non-genetic risk factors and study their  
493 effects on larger and more diverse multi-ancestry populations.

494

495 **Acknowledgements:** We acknowledge the Penn Medicine BioBank (PMBB) for  
496 providing data and thank the patient-participants of Penn Medicine who consented to  
497 participate in this research program. We would also like to thank the Penn Medicine BioBank  
498 team and Regeneron Genetics Center for providing genetic variant data for analysis. The  
499 PMBB is approved under IRB protocol #813913 and supported by Perelman School of  
500 Medicine at University of Pennsylvania. Approval for PMBB was given from the University  
501 of Pennsylvania Institutional Review Board. The PMBB study has been determined to pose  
502 minimal risk to subjects.

503

504 **Sources of Funding:** The eMERGE Network was initiated and funded by NHGRI  
505 through the following grants:

506 Phase IV: U01HG011172 (Cincinnati Children's Hospital Medical Center); U01HG011175  
507 (Children's Hospital of Philadelphia); U01HG008680 (Columbia University); U01HG011176  
508 (Icahn School of Medicine at Mount Sinai); U01HG008685 (Mass General Brigham);  
509 U01HG006379 (Mayo Clinic); U01HG011169 (Northwestern University); U01HG011167  
510 (University of Alabama at Birmingham); U01HG008657 (University of Washington Medical  
511 Center, Seattle); U01HG011181 (Vanderbilt University Medical Center); U01HG011166  
512 (Vanderbilt University Medical Center serving as the Coordinating Center)  
513 Phase III: U01HG8657 (Kaiser Permanente Washington/University of Washington Medical  
514 Center); U01HG8685 (Brigham and Women's Hospital); U01HG8672 (Vanderbilt University  
515 Medical Center); U01HG8666 (Cincinnati Children's Hospital Medical Center); U01HG6379  
516 (Mayo Clinic); U01HG8679 (Geisinger Clinic); U01HG8680 (Columbia University Health  
517 Sciences); U01HG8684 (Children's Hospital of Philadelphia); U01HG8673 (Northwestern  
518 University); U01HG8701 (Vanderbilt University Medical Center serving as the Coordinating  
519 Center); U01HG8676 (Partners Healthcare/Broad Institute); and U01HG8664 (Baylor  
520 College of Medicine).

521

522 **Disclosures:** None

## 523 **References:**

- 524 1. Chang C, Zhang K, Veluchamy A, et al. A Genome-Wide Association Study Provides  
525 New Evidence That CACNA1C Gene is Associated With Diabetic Cataract. *Invest*  
526 *Ophthalmol Vis Sci*. 2016;57(4):2246-2250.
- 527 2. Patel SR. Shared genetic risk factors for obstructive sleep apnea and obesity. *J Appl*  
528 *Physiol (1985)*. 2005;99(4):1600-1606.

- 529 3. Zhuang QS, Zheng H, Gu XD, Shen L, Ji HF. Detecting the genetic link between  
530 Alzheimer's disease and obesity using bioinformatics analysis of GWAS  
531 data. *Oncotarget*. 2017;8(34):55915-55919.
- 532 4. Rashkin SR, Graff RE, Kachuri L, et al. Pan-cancer study detects genetic risk variants  
533 and shared genetic basis in two large cohorts. *Nat Commun*. 2020;11(1):4423.  
534 Published 2020 Sep 4.
- 535 5. Blüher M. Obesity: global epidemiology and pathogenesis. *Nat Rev Endocrinol*.  
536 2019;15(5):288-298.
- 537 6. Saeedi P, Petersohn I, Salpea P, et al. Global and regional diabetes prevalence  
538 estimates for 2019 and projections for 2030 and 2045: Results from the International  
539 Diabetes Federation Diabetes Atlas, 9<sup>th</sup> edition. *Diabetes Res Clin Pract*.  
540 2019;157:107843.
- 541 7. GBD 2015 Mortality and Causes of Death Collaborators. Global, regional, and  
542 national life expectancy, all-cause mortality, and cause-specific mortality for 249  
543 causes of death, 1980-2015: a systematic analysis for the Global Burden of Disease  
544 Study 2015 [published correction appears in *Lancet*. 2017 Jan  
545 7;389(10064):e1]. *Lancet*. 2016;388(10053):1459-1544.
- 546 8. Buddeke J, Bots ML, van Dis I, et al. Comorbidity in patients with cardiovascular  
547 disease in primary care: a cohort study with routine healthcare data. *Br J Gen Pract*.  
548 2019;69(683):e398-e406.
- 549 9. Kendir C, van den Akker M, Vos R, Metsemakers J. Cardiovascular disease patients  
550 have increased risk for comorbidity: A cross-sectional study in the Netherlands. *Eur J*  
551 *Gen Pract*. 2018;24(1):45-50.
- 552 10. Kulie T, Slattengren A, Redmer J, Counts H, Eglash A, Schragger S. Obesity and  
553 women's health: an evidence-based review. *J Am Board Fam Med*. 2011;24(1):75-85.

- 554 11. Fox R, Kitt J, Leeson P, Aye CYL, Lewandowski AJ. Preeclampsia: Risk Factors,  
555 Diagnosis, Management, and the Cardiovascular Impact on the Offspring. *J Clin Med*.  
556 2019;8(10):1625. Published 2019 Oct 4.
- 557 12. Say L, Chou D, Gemmill A, et al. Global causes of maternal death: a WHO  
558 systematic analysis. *Lancet Glob Health*. 2014;2(6):e323-e333.
- 559 13. Baharuddin M, Amelia D, Suhowatsky S, Kusuma A, Suhargono MH, Eng B.  
560 Maternal death reviews: A retrospective case series of 90 hospital-based maternal  
561 deaths in 11 hospitals in Indonesia. *Int J Gynaecol Obstet*. 2019;144 Suppl 1:59-64.
- 562 14. Gerdts E, Regitz-Zagrosek V. Sex differences in cardiometabolic disorders. *Nat Med*.  
563 2019;25(11):1657-1666.
- 564 15. Garovic VD, August P. Preeclampsia and the future risk of hypertension: the pregnant  
565 evidence. *Curr Hypertens Rep*. 2013;15(2):114-121.
- 566 16. Tooher J, Thornton C, Makris A, Ogle R, Korda A, Hennessy A. All Hypertensive  
567 Disorders of Pregnancy Increase the Risk of Future Cardiovascular Disease.  
568 *Hypertension*. 2017 Oct;70(4):798-803.
- 569 17. Gambineri A, Pelusi C, Vicennati V, Pagotto U, Pasquali R. Obesity and the  
570 polycystic ovary syndrome. *Int J Obes Relat Metab Disord*. 2002;26(7):883-896.
- 571 18. Kwak SH, Jang HC, Park KS. Finding genetic risk factors of gestational  
572 diabetes. *Genomics Inform*. 2012;10(4):239-243.
- 573 19. Gambineri A, Patton L, Altieri P, et al. Polycystic ovary syndrome is a risk factor for  
574 type 2 diabetes: results from a long-term prospective study. *Diabetes*.  
575 2012;61(9):2369-2374. doi:10.2337/db11-1360
- 576 20. Mu F, Rich-Edwards J, Rimm EB, Spiegelman D, Missmer SA. Endometriosis and  
577 Risk of Coronary Heart Disease. *Circ Cardiovasc Qual Outcomes*. 2016;9(3):257-  
578 264.



- 579 21. Dawson A, Fernandez ML, Anglesio M, Yong PJ, Carey MS. Endometriosis and  
580 endometriosis-associated cancers: new insights into the molecular mechanisms of  
581 ovarian cancer development. *Ecancermedicalscience*. 2018;12:803.
- 582 22. Paul A, Paul S. The breast cancer susceptibility genes (BRCA) in breast and ovarian  
583 cancers. *Front Biosci (Landmark Ed)*. 2014;19:605-618.
- 584 23. Nilsson E, Salonen Ros H, Cnattingius S, Lichtenstein P. The importance of genetic  
585 and environmental effects for pre-eclampsia and gestational hypertension: a family  
586 study. *BJOG*. 2004;111(3):200-206.
- 587 24. Vink JM, Sadrzadeh S, Lambalk CB, Boomsma DI. Heritability of polycystic ovary  
588 syndrome in a Dutch twin-family study. *J Clin Endocrinol Metab*. 2006;91(6):2100-  
589 2104. doi:10.1210/jc.2005-1494
- 590 25. Vujkovic M, Keaton JM, Lynch JA, et al. Discovery of 318 new risk loci for type 2  
591 diabetes and related vascular outcomes among 1.4 million participants in a multi-  
592 ancestry meta-analysis. *Nat Genet*. 2020;52(7):680-691.
- 593 26. Justice AE, Winkler TW, Feitosa MF, et al. Genome-wide meta-analysis of 241,258  
594 adults accounting for smoking behaviour identifies novel loci for obesity traits. *Nat*  
595 *Commun*. 2017;8:14977.
- 596 27. Lewis CM, Vassos E. Polygenic risk scores: from research tools to clinical  
597 instruments. *Genome Med*. 2020;12(1):44. Published 2020 May 18.
- 598 28. Khera AV, Chaffin M, Aragam KG, et al. Genome-wide polygenic scores for  
599 common diseases identify individuals with risk equivalent to monogenic  
600 mutations. *Nat Genet*. 2018;50(9):1219-1224.
- 601 29. Steinthorsdottir V, McGinnis R, Williams NO, et al. Genetic predisposition to  
602 hypertension is associated with preeclampsia in European and Central Asian women.  
603 *Nat Commun*. 2020;11(1):5976.

- 604 30. Verma A, Ritchie MD. Current Scope and Challenges in Phenome-Wide Association  
605 Studies. *Curr Epidemiol Rep*. 2017;4(4):321-329.
- 606 31. Fritsche LG, Gruber SB, Wu Z, et al. Association of Polygenic Risk Scores for  
607 Multiple Cancers in a Phenome-wide Study: Results from The Michigan Genomics  
608 Initiative. *Am J Hum Genet*. 2018;102(6):1048-1061.
- 609 32. Shen X, Howard DM, Adams MJ, et al. A phenome-wide association and Mendelian  
610 Randomisation study of polygenic risk for depression in UK Biobank. *Nat Commun*.  
611 2020;11(1):2301.
- 612 33. Chang CC, Chow CC, Tellier LC, Vattikuti S, Purcell SM, Lee JJ. Second-generation  
613 PLINK: rising to the challenge of larger and richer datasets. *Gigascience*. 2015;4:7.
- 614 34. Bulik-Sullivan BK, Loh PR, Finucane HK, et al. LD Score regression distinguishes  
615 confounding from polygenicity in genome-wide association studies. *Nat Genet*.  
616 2015;47(3):291-295.
- 617 35. Martin AR, Kanai M, Kamatani Y, Okada Y, Neale BM, Daly MJ. Clinical use of  
618 current polygenic risk scores may exacerbate health disparities. *Nat Genet*.  
619 2019;51(4):584-591.
- 620 36. Duncan L, Shen H, Gelaye B, et al. Analysis of polygenic risk score usage and  
621 performance in diverse human populations. *Nat Commun*. 2019;10(1):3328.
- 622 37. Viechtbauer, W. Conducting Meta-Analyses in R with the metafor Package. *Journal*  
623 *of Statistical Software*. 2010;36(3):1-48.
- 624 38. Ge T, Chen CY, Ni Y, Feng YA, Smoller JW. Polygenic prediction via Bayesian  
625 regression and continuous shrinkage priors. *Nat Commun*. 2019;10(1):1776.
- 626 39. Pendergrass SA, Dudek SM, Crawford DC, Ritchie MD. Visually integrating and  
627 exploring high throughput Phenome-Wide Association Study (PheWAS) results using  
628 PheWAS-View. *BioData Min*. 2012;5(1):5.

- 629 40. Hemani G, Zheng J, Elsworth B, et al. The MR-Base platform supports systematic  
630 causal inference across the human phenome. *Elife*. 2018;7:e34408.
- 631 41. Onstad MA, Schmandt RE, Lu KH. Addressing the Role of Obesity in Endometrial  
632 Cancer Risk, Prevention, and Treatment. *J Clin Oncol*. 2016;34(35):4225-4230.
- 633 42. Mehta LS, Watson KE, Barac A, et al. Cardiovascular Disease and Breast Cancer:  
634 Where These Entities Intersect: A Scientific Statement From the American Heart  
635 Association [published correction appears in *Circulation*. 2019 Aug  
636 27;140(9):e543]. *Circulation*. 2018;137(8):e30-e66.
- 637 43. Huang K, Zhong J, Li Q, et al. Effects of CDKN2B-AS1 polymorphisms on the  
638 susceptibility to coronary heart disease. *Mol Genet Genomic Med*. 2019;7(11):e955.
- 639 44. Qin S, Ning M, Liu Q, Ding X, Wang Y, Liu Q. Knockdown of long non-coding  
640 RNA CDKN2B-AS1 suppresses the progression of breast cancer by miR-122-  
641 5p/STK39 axis. *Bioengineered*. 2021;12(1):5125-5137.
- 642 45. Kojima Y, Downing K, Kundu R, et al. Cyclin-dependent kinase inhibitor 2B  
643 regulates efferocytosis and atherosclerosis. *J Clin Invest*. 2014;124(3):1083-1097.
- 644 46. Motterle A, Pu X, Wood H, et al. Functional analyses of coronary artery disease  
645 associated variation on chromosome 9p21 in vascular smooth muscle cells. *Hum Mol  
646 Genet*. 2012;21(18):4021-4029.
- 647 47. Clark SL, Parham M, Shadyab AH, et al. Broad Clinical Manifestations of Polygenic  
648 Risk for Coronary Artery Disease in the Women's Health Initiative. medRxiv  
649 2021.06.15.21258993
- 650 48. Kanegae H, Oikawa T, Okawara Y, Hoshida S, Kario K. Which blood pressure  
651 measurement, systolic or diastolic, better predicts future hypertension in normotensive  
652 young adults?. *J Clin Hypertens (Greenwich)*. 2017;19(6):603-610.

- 653 49. Sesso HD, Stampfer MJ, Rosner B, et al. Systolic and diastolic blood pressure, pulse  
654 pressure, and mean arterial pressure as predictors of cardiovascular disease risk in  
655 Men. *Hypertension*. 2000;36(5):801-807.
- 656 50. Kachuri L, Graff RE, Smith-Byrne K, et al. Pan-cancer analysis demonstrates that  
657 integrating polygenic risk scores with modifiable risk factors improves risk  
658 prediction. *Nat Commun*. 2020;11(1):6084.

## 659 **Figure Legends:**

660 **Figure 1: Genetic correlation and the influence of shared genetic burden of**  
661 **cardiometabolic traits and health conditions unique to females.** Panel A shows a heatmap  
662 of genetic correlation from cross-trait LDSC analyses: Blue represents negative correlation  
663 and red represents positive correlation. An \* in each box suggests statistical significance of  
664 results based on p-values. Panels B, C and D refer to PRS based meta-analyses between  
665 cardiometabolic PRS and case/controls status of female-specific diseases in overall, EUR and  
666 AFR ancestry individuals respectively. The first panel in these plots corresponds to p-values  
667 and second panel represents beta estimates. The color of each point refers to the PRS for  
668 cardiometabolic traits.

669

670 **Figure 2: Inverse relationship between Coronary Artery Disease (CAD) and Breast**  
671 **Cancer.** Panel A shows the heatmap of negative genetic correlation between CAD and breast  
672 cancer from the UKBB Genetic Correlation Browser dataset. The gradient of color refers to  
673 positive (red) to negative (blue) correlation, and the text in each box refers to the genetic  
674 correlation coefficient. Panel B shows the distribution of breast cancer per each PRS<sub>CAD</sub>  
675 quintile. The x-axis represents each PRS quintile, and the y-axis is the disease prevalence.  
676 The color of each point refers to the ancestry group (All, European, and African), and the

677 shape indicates the target dataset (eMERGE (circle) or PMBB (triangle)). Panel C is a Venn  
678 diagram representing the overlap of CAD and breast cancer cases in PMBB and eMERGE  
679 datasets based on disease diagnosis.

680

681 **Figure 3: Mendelian Randomization (MR) results for 29 significant PRS based**  
682 **associations.** This figure shows forest plots of association between female health conditions  
683 as outcomes and cardiometabolic phenotypes as exposures in a one-sample MR analyses  
684 shown in Panel A and two-sample MR analyses shown in Panel B. Genetic instruments are  
685 the cardiometabolic PRS in the one-sample MR and genome-wide significant SNPs from  
686 GWAS in the two-sample MR. In panel A, each point refers to beta outcome/SD exposure for  
687  $PRS_{BMI}$  and  $\log(OR)$  outcome for all other exposure variables for each tests performed as  
688 separated by ancestry. In panel B, each point refers to beta outcome/SD exposure for BMI  
689 and beta outcome/SD  $\log(OR)$  exposure for all other variables across all methods used in  
690 sensitivity analyses for two-sample MR. P-values are reported in last column in both panels.

691

692 **Figure 4: Chronology analyses for the visualization of events from the EHR.** Circular  
693 plot showing disease prevalence among high  $PRS_{BMI}$  (in yellow) and low  $PRS_{BMI}$  (in blue)  
694 categories. General female health conditions are shown in panel A and pregnancy and  
695 childbirth-related phenotypes are shown in panel B. The circular plots are divided into five  
696 age categories (<25, 25-40, 40-55, 55-70, and >70) for general female health conditions and  
697 three age categories (<25, 25-40, and 40-55) for pregnancy-related phenotypes

**Tables:**

**Table 1:** Sample size in PMBB and eMERGE datasets, for overall and stratified by ancestry analyses.

| Phenotype                         | PMBB Sample Size<br>(N Cases) |                   |                  | eMERGE Sample Size<br>(N Cases) |                    |                  |
|-----------------------------------|-------------------------------|-------------------|------------------|---------------------------------|--------------------|------------------|
|                                   | All                           | EUR               | AFR              | All                             | EUR                | AFR              |
| <i>Cardiometabolic Phenotypes</i> |                               |                   |                  |                                 |                    |                  |
| BMI                               | 20,209                        | 12,344            | 6,744            | 39,403                          | 31,875             | 5,250            |
| CAD                               | 21,837<br>(3,002)             | 13,515<br>(1,956) | 7,039<br>(955)   | 49,171<br>(9,597)               | 37,003<br>(7,524)  | 8,308<br>(1,308) |
| DBP                               | 21,612                        | 13,343            | 6,994            | NA                              | NA                 | NA               |
| Hypertension                      | 21,837<br>(10,278)            | 13,515<br>(5,640) | 7,039<br>(4,286) | 49,171<br>(27,685)              | 37,003<br>(20,820) | 8,308<br>(4,695) |
| T2D                               | 21,837<br>(4,388)             | 13,515<br>(1,969) | 7,039<br>(2,221) | 49,171<br>(12,403)              | 37,003<br>(8,311)  | 8,308<br>(2,725) |
| <i>Women's Health Phenotypes</i>  |                               |                   |                  |                                 |                    |                  |
| Breast cancer                     | 21,837<br>(1,621)             | 13,515<br>(1,621) | 7,039<br>(415)   | 49,171<br>(4,148)               | 37,003<br>(3,532)  | 8,308<br>(408)   |

|                          |                  |                 |                |                   |                   |                |
|--------------------------|------------------|-----------------|----------------|-------------------|-------------------|----------------|
| Cervical cancer          | 21,837<br>(105)  | 13,515<br>(53)  | 7,039<br>(50)  | 49,171<br>(332)   | 37,003<br>(252)   | 8,308<br>(52)  |
| Ectopic pregnancy        | 2,808<br>(1,779) | 1,201<br>(827)  | 1,319<br>(757) | 3,078<br>(332)    | 1,975<br>(521)    | 641<br>(153)   |
| Endometrial cancer       | 21,837<br>(286)  | 13,515<br>(183) | 7,039<br>(90)  | 49,171<br>(771)   | 37,003<br>(653)   | 8,308<br>(74)  |
| Endometriosis            | 21,837<br>(701)  | 13,515<br>(320) | 7,039<br>(340) | 49,171<br>(2,314) | 37,003<br>(1,805) | 8,308<br>(330) |
| Excessive fetal growth   | 693<br>(85)      | 293<br>(37)     | 329<br>(42)    | 2,433<br>(627)    | 1,618<br>(377)    | 437<br>(150)   |
| Gestational diabetes     | 2,655<br>(523)   | 1,111<br>(193)  | 1,262<br>(248) | 3,174<br>(762)    | 2,005<br>(414)    | 719<br>(244)   |
| Gestational hypertension | 2,666<br>(631)   | 1,118<br>(256)  | 1,275<br>(324) | 3,135<br>(703)    | 1,980<br>(383)    | 711<br>(235)   |
| Intrauterine death       | 685<br>(57)      | 289<br>(23)     | 324<br>(27)    | 2,156<br>(64)     | 1,438<br>(38)     | 358<br>(17)    |
| Miscarriage              | 2,934<br>(389)   | 1,273<br>(199)  | 1,360<br>(151) | 3,568<br>(823)    | 2,323<br>(547)    | 740<br>(182)   |
| Ovarian cancer           | 21,837<br>(305)  | 13,515<br>(191) | 7,039<br>(89)  | 49,171<br>(1,589) | 37,003<br>(1,324) | 8,308<br>(177) |

|                                   |                   |                 |                |                   |                   |                  |
|-----------------------------------|-------------------|-----------------|----------------|-------------------|-------------------|------------------|
| Placenta<br>abruption/previa      | 1,192<br>(396)    | 482<br>(157)    | 586<br>(195)   | 2,674<br>(997)    | 1,697<br>(616)    | 583<br>(240)     |
| Polycystic<br>ovarian<br>syndrome | 21,837<br>(736)   | 13,515<br>(387) | 7,039<br>(272) | 49,171<br>(1,006) | 37,003<br>(690)   | 8,308<br>(200)   |
| Poor fetal<br>growth              | 792<br>(202)      | 325<br>(78)     | 388<br>(107)   | 2,209<br>(167)    | 1,478<br>(102)    | 360<br>(21)      |
| Postpartum<br>depression          | 924<br>(384)      | 374<br>(136)    | 466<br>(226)   | 2,417<br>(555)    | 1,579<br>(319)    | 457<br>(157)     |
| Postpartum<br>hemorrhage          | 846<br>(283)      | 350<br>(108)    | 408<br>(146)   | 2,320<br>(401)    | 1,544<br>(250)    | 408<br>(104)     |
| Preeclampsia                      | 2,631<br>(452)    | 1,100<br>(149)  | 1,264<br>(272) | 3,132<br>(702)    | 1,974<br>(377)    | 713<br>(13)      |
| Preterm birth                     | 687<br>(66)       | 284<br>(21)     | 332<br>(40)    | 2,144<br>(57)     | 1,433<br>(30)     | 350<br>(13)      |
| Stillbirth                        | 649<br>(17)       | 270<br>(3)      | 311<br>(12)    | 2,123<br>(8)      | 1,417<br>(6)      | 347<br>(0)       |
| Uterine cancer                    | 21,837<br>(113)   | 13,515<br>(66)  | 7,039<br>(43)  | 49,171<br>(418)   | 37,003<br>(340)   | 8,308<br>(58)    |
| Uterine fibroid                   | 21,837<br>(1,570) | 13,515<br>(516) | 7,039<br>(984) | 49,171<br>(5,711) | 37,003<br>(3,912) | 8,308<br>(1,347) |



|                |                |                |               |                 |                |               |
|----------------|----------------|----------------|---------------|-----------------|----------------|---------------|
| Vaginal cancer | 21,837<br>(23) | 13,515<br>(13) | 7,039<br>(9)  | 49,171<br>(109) | 37,003<br>(86) | 8,308<br>(17) |
| Vulvar cancer  | 21,837<br>(41) | 13,515<br>(25) | 7,039<br>(14) | 49,171<br>(120) | 37,003<br>(92) | 8,308<br>(19) |

**Table 2:** GWAS summary statistics datasets that are used for the calculation of genetic correlations and polygenic risk scores and the number of SNPs used from each GWAS to calculate the corresponding PRS.

| <b>Phenotype</b> | <b>Ancestries Included</b> | <b>Source</b>                        | <b>Sample Size (Number of Cases)</b> | <b>PMID</b> | <b>N SNPs included in PRS</b>            |
|------------------|----------------------------|--------------------------------------|--------------------------------------|-------------|------------------------------------------|
| Type 2 Diabetes  | EUR, AFR, EAS, SAS, HIS    | Vujkovic et al., Nat Gen, 2020, MVP  | 1,407,282<br>(228,499)               | 32541925    | PMBB:<br>1,023,697<br>eMERGE:<br>716,330 |
| Body Mass Index  | EUR, AFR, EAS, SAS, HIS    | Justice et al., Nat Com, 2017, GIANT | 241,258                              | 28443625    | PMBB: 885,143<br>eMERGE:<br>614,668      |

|                             |                         |                                                                |                   |          |                                    |
|-----------------------------|-------------------------|----------------------------------------------------------------|-------------------|----------|------------------------------------|
| Hypertension (DBP, SBP, PP) | EUR, AFR, EAS, SAS, HIS | Giri et al., Nat Gen, 2019, MVP                                | 318,891           | 30578418 | PMBB: 1,024,567<br>eMERGE: 715,471 |
| Coronary Artery Disease     | EUR, EAS, SAS, HIS, AFR | van der Harst et al., Circ Res, 2018, CARDIoGRAMplusC4D + UKBB | 547,261 (122,733) | 29212778 | PMBB: 981,480<br>eMERGE: 681,029   |

\*\*DBP= Diastolic Blood Pressure; SBP= Systolic Blood Pressure; PP= Pulse Pressure; EUR= European ancestry; EAS= East Asian ancestry; SAS= South Asian ancestry; HIS= Hispanic ancestry; AFR= African ancestry; MVP= Million Veterans Program; GIANT=The Genetic Investigation of ANthropometric Traits; UKB= UK BioBank

**Table 3:** Effect estimates for testing association of PRS with its primary phenotype in eMERGE and PMBB datasets

| Phenotype          | Ancestry | N Total | N Cases | R <sup>2</sup> or AUC of Full Model | Beta    | SE      | P-value   | R <sup>2</sup> or AUC of Null Model | R <sup>2</sup> or AUC of PRS only Model |
|--------------------|----------|---------|---------|-------------------------------------|---------|---------|-----------|-------------------------------------|-----------------------------------------|
| <i>eMERGE</i>      |          |         |         |                                     |         |         |           |                                     |                                         |
| BMI                | All      | 39,403  |         | 0.08494                             | 2.378   | 0.05044 | 0         | 0.0334                              | 0.0593                                  |
|                    | EUR      | 31,875  |         | 0.07208                             | 2.336   | 0.05144 | 0         | 0.0121                              | 0.0583                                  |
|                    | AFR      | 5,250   |         | 0.07424                             | 2.76    | 0.25    | 5.01E-28  | 0.0529                              | 0.0201                                  |
| CAD                | All      | 49,171  | 9,597   | 0.784                               | 0.3091  | 0.01318 | 1.62E-121 | 0.7745                              | 0.5474                                  |
|                    | EUR      | 37,003  | 7,524   | 0.7722                              | 0.3096  | 0.01427 | 2.82E-104 | 0.7608                              | 0.5614                                  |
|                    | AFR      | 8,308   | 1,308   | 0.8299                              | 0.308   | 0.04789 | 1.24E-10  | 0.827                               | 0.5442                                  |
| DBP (Hypertension) | All      | 49,171  | 27,685  | 0.8109                              | 0.1387  | 0.01347 | 7.17E-25  | 0.8099                              | 0.529                                   |
|                    | EUR      | 37,003  | 20,820  | 0.7961                              | 0.1464  | 0.01487 | 7.02E-23  | 0.7946                              | 0.5339                                  |
|                    | AFR      | 8,308   | 4,695   | 0.8634                              | 0.1503  | 0.04098 | 0.000245  | 0.8628                              | 0.5114                                  |
| PP (Hypertension)  | All      | 49,171  | 27,685  | 0.8115                              | 0.1644  | 0.01344 | 2.15E-34  | 0.8099                              | 0.526                                   |
|                    | EUR      | 37,003  | 20,820  | 0.7969                              | 0.1712  | 0.01438 | 1.13E-32  | 0.7946                              | 0.5273                                  |
|                    | AFR      | 8,308   | 4,695   | 0.8629                              | 0.09689 | 0.04871 | 0.0467    | 0.8628                              | 0.5049                                  |
| SBP (Hypertension) | All      | 49,171  | 27,685  | 0.8131                              | 0.2977  | 0.01665 | 1.86E-71  | 0.8099                              | 0.5352                                  |
|                    | EUR      | 37,003  | 20,820  | 0.7992                              | 0.3156  | 0.01793 | 2.28E-69  | 0.7946                              | 0.5428                                  |
|                    | AFR      | 8,308   | 4,695   | 0.8637                              | 0.2845  | 0.06227 | 4.91E-06  | 0.8628                              | 0.5116                                  |
| T2D                | All      | 49,171  | 12,403  | 0.7193                              | 0.6334  | 0.01914 | 3.02E-240 | 0.691                               | 0.6163                                  |
|                    | EUR      | 37,003  | 8,311   | 0.6869                              | 0.6311  | 0.0205  | 3.56E-208 | 0.6414                              | 0.6033                                  |
|                    | AFR      | 8,308   | 2,725   | 0.7795                              | 0.6318  | 0.06546 | 4.83E-22  | 0.7728                              | 0.5597                                  |
| <i>PMBB</i>        |          |         |         |                                     |         |         |           |                                     |                                         |

|                    |     |        |        |         |        |         |           |          |         |
|--------------------|-----|--------|--------|---------|--------|---------|-----------|----------|---------|
| BMI                | All | 20,209 |        | 0.1542  | 2.658  | 0.08244 | 2.05E-222 | 0.1108   | 0.1417  |
|                    | EUR | 12,344 |        | 0.07473 | 2.621  | 0.08679 | 2.66E-193 | 0.006422 | 0.06782 |
|                    | AFR | 6,744  |        | 0.03203 | 2.708  | 0.2089  | 5.75E-38  | 0.008037 | 0.02711 |
| CAD                | All | 21,837 | 3,002  | 0.8235  | 0.3571 | 0.02354 | 5.73E-52  | 0.8148   | 0.5619  |
|                    | EUR | 13,515 | 1,956  | 0.8303  | 0.3894 | 0.02732 | 4.44E-46  | 0.8185   | 0.5929  |
|                    | AFR | 7,039  | 955    | 0.799   | 0.2566 | 0.05214 | 8.60E-07  | 0.7955   | 0.5389  |
| DBP                | All | 21,612 |        | 0.0425  | 1.036  | 0.06661 | 3.05E-54  | 0.03183  | 0.02905 |
|                    | EUR | 13,343 |        | 0.01534 | 0.9964 | 0.08064 | 7.01E-35  | 0.004144 | 0.01213 |
|                    | AFR | 6,994  |        | 0.04559 | 1.104  | 0.129   | 1.35E-17  | 0.03571  | 0.01375 |
| PP (Hypertension)  | All | 21,837 | 10,278 | 0.8125  | 0.1942 | 0.02328 | 7.18E-17  | 0.8112   | 0.602   |
|                    | EUR | 13,515 | 5,640  | 0.7797  | 0.1918 | 0.02638 | 3.53E-13  | 0.7778   | 0.5272  |
|                    | AFR | 7,039  | 4,286  | 0.8389  | 0.1886 | 0.05376 | 0.00045   | 0.8383   | 0.5391  |
| SBP (Hypertension) | All | 21,837 | 10,278 | 0.8144  | 0.327  | 0.02523 | 2.08E-38  | 0.8112   | 0.6097  |
|                    | EUR | 13,515 | 5,640  | 0.7813  | 0.279  | 0.02846 | 1.11E-22  | 0.7778   | 0.5397  |
|                    | AFR | 7,039  | 4,286  | 0.8415  | 0.4505 | 0.05923 | 2.81E-14  | 0.8383   | 0.5649  |
| T2D                | All | 21,837 | 4,388  | 0.754   | 0.8136 | 0.03523 | 5.49E-118 | 0.7287   | 0.6713  |
|                    | EUR | 13,515 | 1,969  | 0.712   | 0.8418 | 0.04533 | 5.55E-77  | 0.6634   | 0.6323  |
|                    | AFR | 7,039  | 2,221  | 0.7342  | 0.7896 | 0.05947 | 3.11E-40  | 0.7168   | 0.5919  |

\*\*BMI= Body Mass Index; CAD= Coronarary artery disease, T2D=Type 2 Diabetes; DBP= Diastolic Blood Pressure; SBP= Systolic Blood Pressure; PP= Pulse Pressure; EUR= European ancestry; AFR= African ancestry; Beta coefficients and standard errors are per SD PRS in the full model. Covariates included: birth year and the first five PCs.

**Table 4:** FDR-significant (FDR P-value < 0.05) associations between cardiometabolic PRS and female health conditions identified in the PMBB and eMERGE meta-analysis

| PRS | Association              | Ancestry | Beta    | SE     | OR    | 95% CI      | P-value                |
|-----|--------------------------|----------|---------|--------|-------|-------------|------------------------|
| BMI | Breast cancer            | All      | -0.071  | 0.0225 | 0.93  | 0.891-0.973 | 0.00159                |
|     | Endometrial cancer       | All      | 0.244   | 0.0458 | 1.28  | 1.17-1.4    | 9.4x10 <sup>-8</sup>   |
|     |                          | EUR      | 0.276   | 0.087  | 1.32  | 1.11-1.56   | 0.00152                |
|     | Gestational diabetes     | All      | 0.23    | 0.0508 | 1.26  | 1.14-1.39   | 6x10 <sup>-6</sup>     |
|     |                          | EUR      | 0.277   | 0.0622 | 1.32  | 1.17-1.49   | 8.69x10 <sup>-6</sup>  |
|     | PCOS                     | All      | 0.272   | 0.0387 | 1.31  | 1.22-1.42   | 2.37x10 <sup>-12</sup> |
|     |                          | EUR      | 0.294   | 0.0451 | 1.34  | 1.23-1.47   | 6.76x10 <sup>-11</sup> |
| CAD | Breast cancer            | All      | -0.0718 | 0.0147 | 0.931 | 0.904-0.958 | 9.96x10 <sup>-7</sup>  |
|     |                          | EUR      | -0.0699 | 0.0168 | 0.932 | 0.902-0.964 | 3.11x10 <sup>-5</sup>  |
|     | Postpartum depression    | EUR      | 0.178   | 0.0577 | 1.19  | 1.07-1.34   | 0.00201                |
| PP  | Gestational hypertension | All      | 0.218   | 0.0443 | 1.24  | 1.14-1.36   | 8.51x10 <sup>-7</sup>  |
|     |                          | EUR      | 0.235   | 0.0558 | 1.26  | 1.13-1.41   | 2.54x10 <sup>-5</sup>  |
|     | Preeclampsia             | All      | 0.196   | 0.0581 | 1.22  | 1.09-1.36   | 0.000762               |

|     |                          |     |         |        |       |             |                        |
|-----|--------------------------|-----|---------|--------|-------|-------------|------------------------|
| SBP | Gestational hypertension | All | 0.332   | 0.0825 | 1.39  | 1.19-1.64   | 5.61x10 <sup>-5</sup>  |
|     |                          | EUR | 0.306   | 0.0661 | 1.36  | 1.19-1.55   | 3.61x10 <sup>-6</sup>  |
|     |                          | AFR | 0.398   | 0.099  | 1.49  | 1.23-1.81   | 5.7x10 <sup>-5</sup>   |
| SBP | Preeclampsia             | All | 0.275   | 0.0799 | 1.32  | 1.13-1.54   | 0.000567               |
|     |                          | EUR | 0.229   | 0.0712 | 1.26  | 1.09-1.45   | 0.0013                 |
|     |                          | AFR | 0.358   | 0.102  | 1.43  | 1.17-1.75   | 0.000517               |
| T2D | Breast cancer            | All | -0.0726 | 0.0213 | 0.93  | 0.892-0.97  | 0.000657               |
|     |                          | EUR | -0.0787 | 0.0263 | 0.924 | 0.878-0.973 | 0.00272                |
|     | Gestational diabetes     | All | 0.587   | 0.063  | 1.8   | 1.59-2.03   | 1.19x10 <sup>-20</sup> |
|     |                          | EUR | 0.678   | 0.0759 | 1.97  | 1.7-2.29    | 3.88x10 <sup>-19</sup> |
|     | Gestational hypertension | All | 0.184   | 0.0642 | 1.2   | 1.06-1.36   | 0.00414                |
|     |                          | EUR | 0.178   | 0.0671 | 1.19  | 1.05-1.36   | 0.00798                |
|     | PCOS                     | All | 0.223   | 0.0428 | 1.25  | 1.15-1.36   | 1.93x10 <sup>-7</sup>  |
|     |                          | EUR | 0.209   | 0.0485 | 1.23  | 1.12-1.36   | 1.56x10 <sup>-5</sup>  |
|     |                          | AFR | 0.32    | 0.104  | 1.38  | 1.12-1.69   | 0.00206                |
|     | Postpartum depression    | All | 0.18    | 0.07   | 1.2   | 1.04-1.37   | 0.0101                 |

\*\*BMI= Body Mass Index; CAD= Coronary artery disease, T2D=Type 2 Diabetes; PCOS=Polycystic ovarian syndrome; EUR= European ancestry; P= PMBB; E= eMERGE; Beta coefficients are per SD PRS. Results were adjusted for birth year and the first five PCs.

**Figures:**

**Figure 1:**

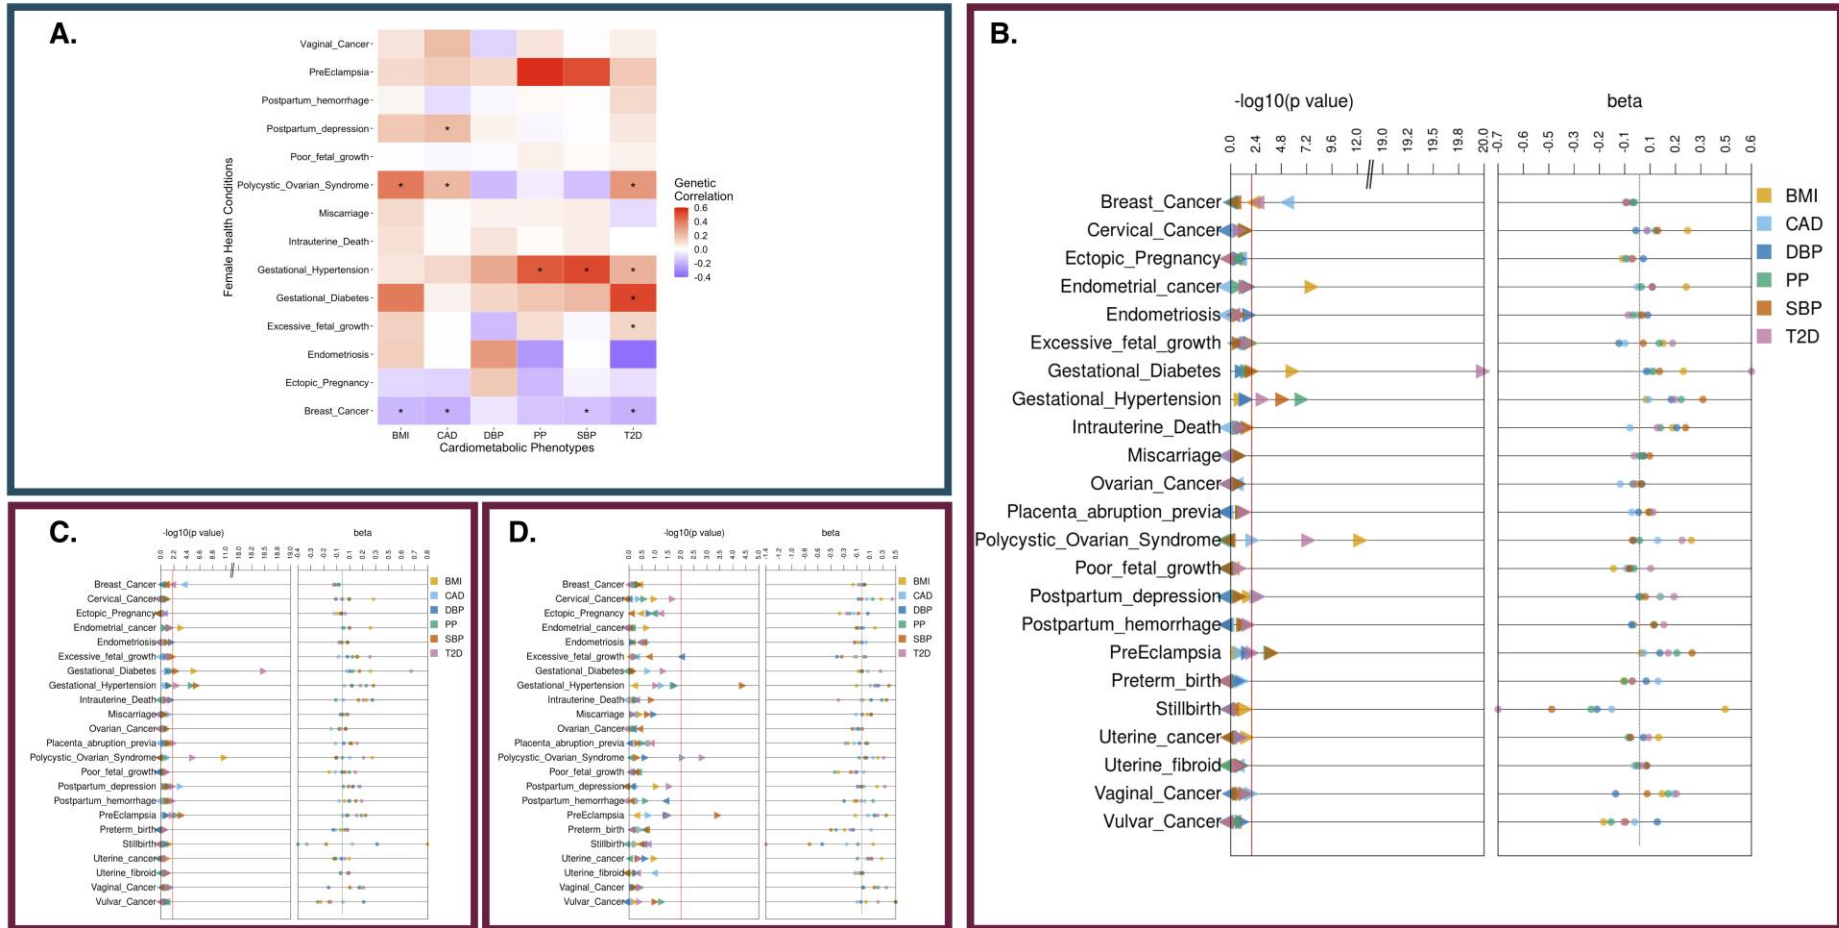



**Figure 2:**

**A.**

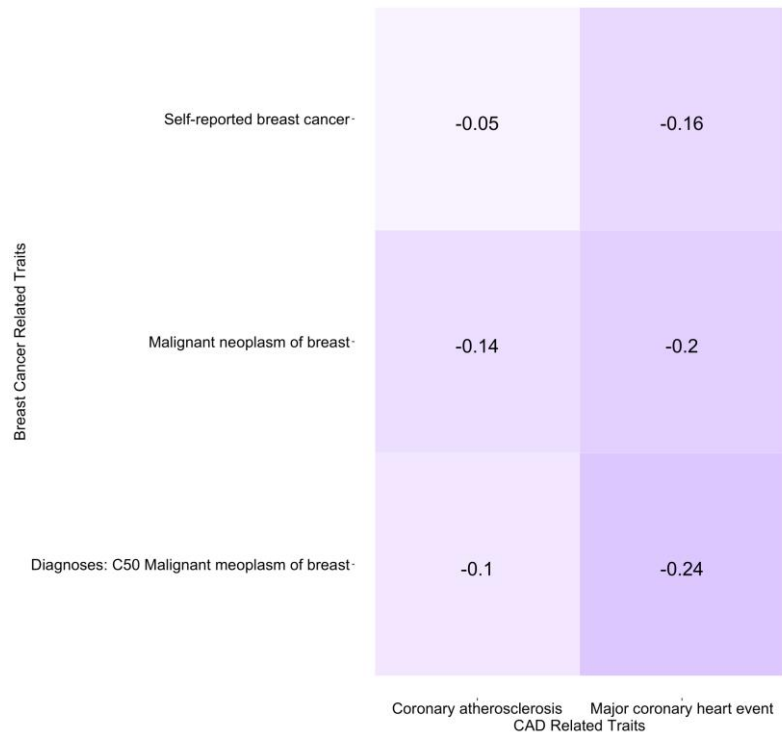

**B.**

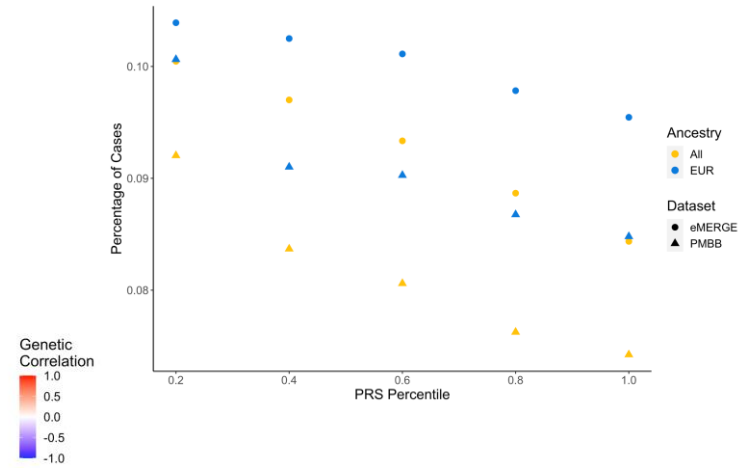

**C.**

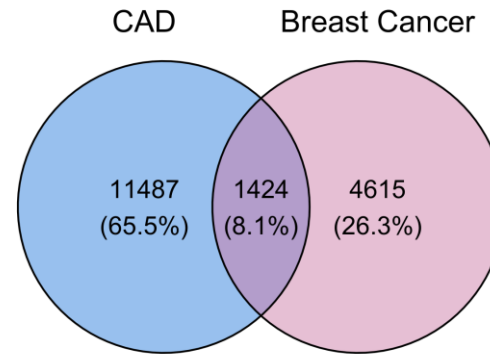

Figure 3:

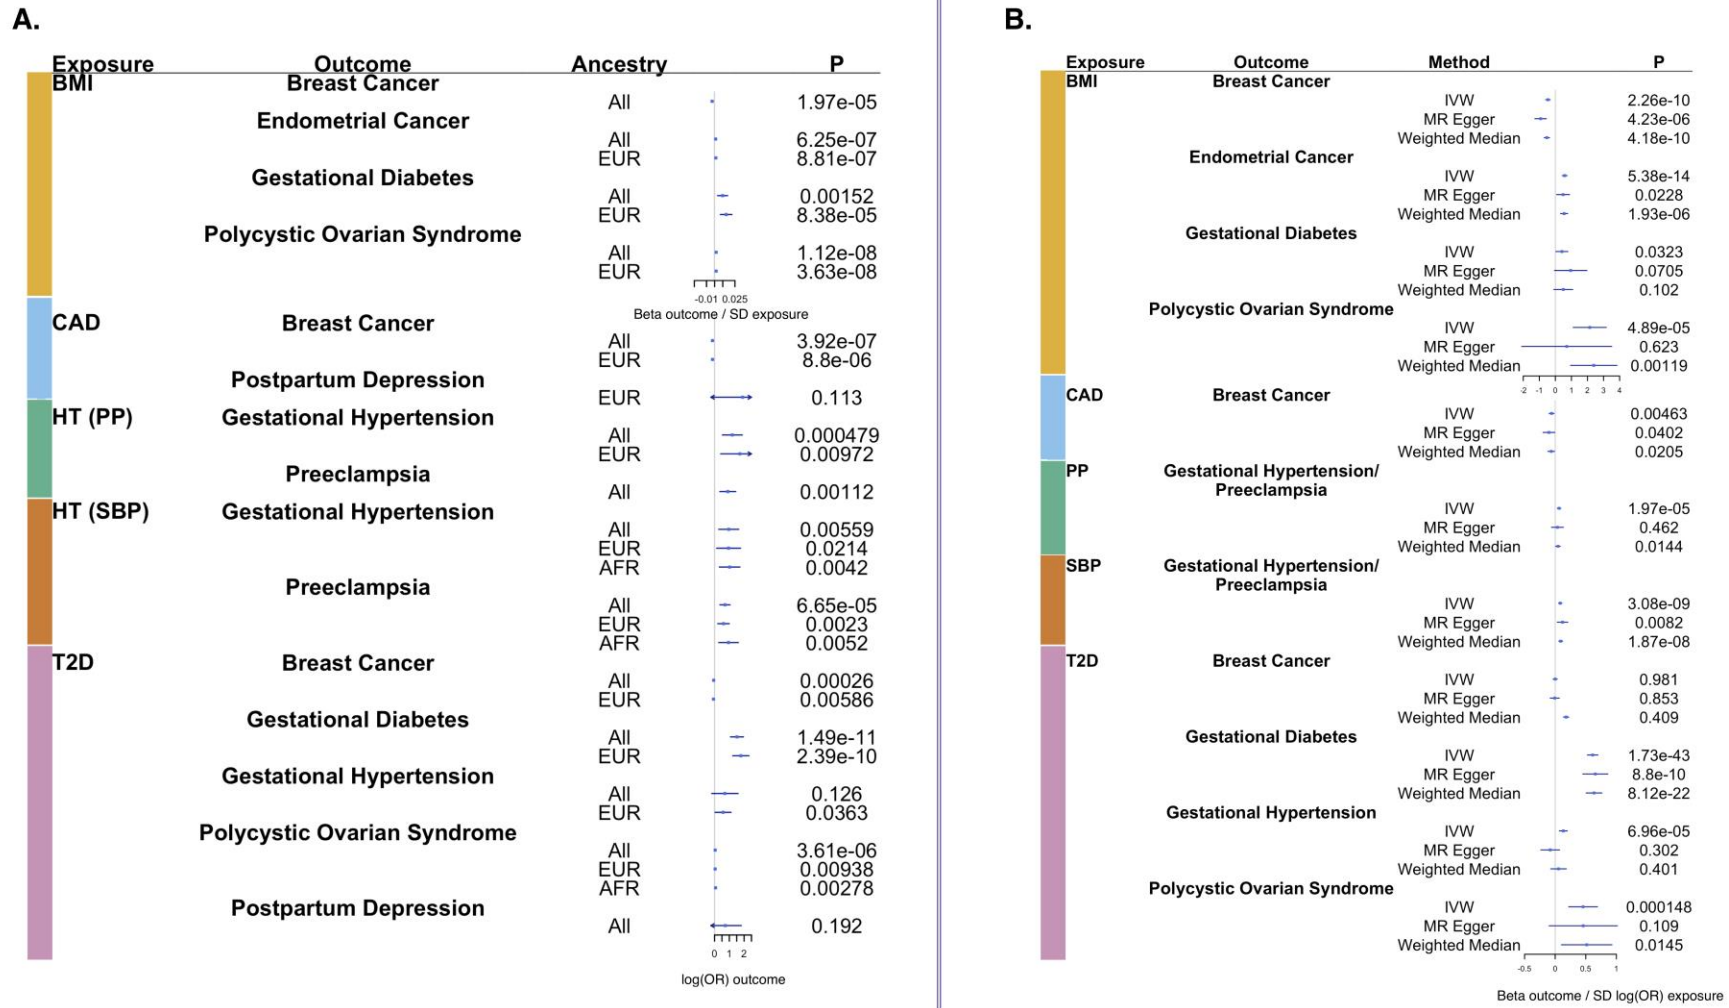

**Figure 4:**

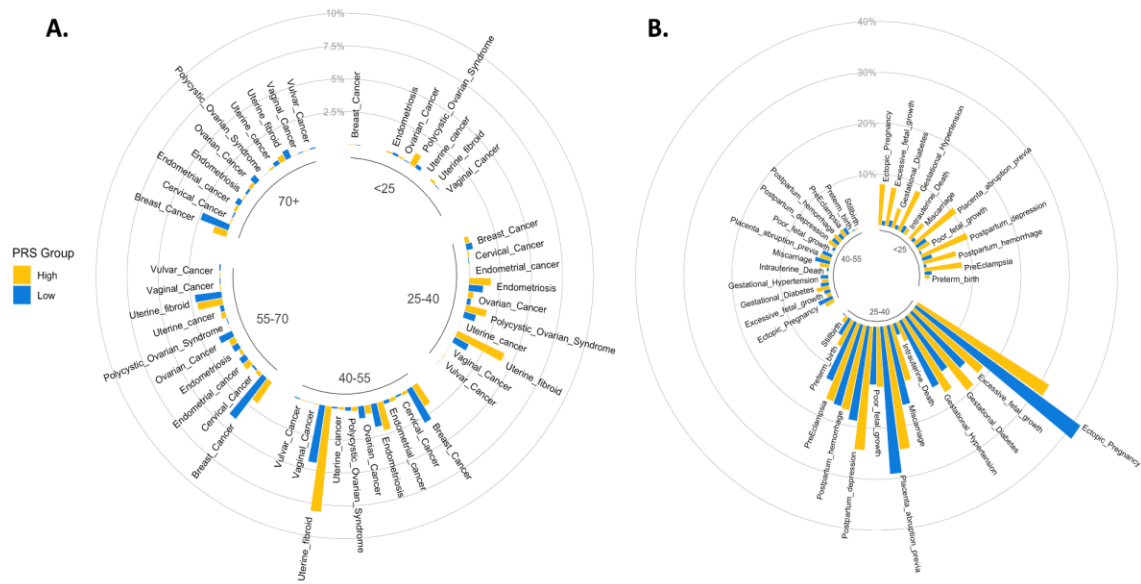

Source: https://medrxiv.org/content/10.1101/2022.02.02.22269844v1.full.pdf
